# Supplementary material for: High-fidelity musculoskeletal modeling reveals that motor planning variability contributes to the speed-accuracy tradeoff
Source: eLife journal article supplement (doi:10.7554/elife.57021), 2020-12-16
Supplement: supp [file elife-57021-supp-v1.zip]

Archive with 13 entries (13 files):
- elife_poa_e57021_Transparent_Reporting_File.docx
- elife_poa_e57021_Video_1.mp4
- elife_poa_e57021_Supplementary_file_1.docx
- elife_poa_e57021_Figure_2_figure_supplement_1.pdf
- elife_poa_e57021_Figure_2_figure_supplement_2.pdf
- elife_poa_e57021_Figure_2_figure_supplement_3.pdf
- elife_poa_e57021_Figure_2_figure_supplement_4.pdf
- elife_poa_e57021_Figure_3_figure_supplement_1.pdf
- elife_poa_e57021_Figure_3_figure_supplement_2.pdf
- elife_poa_e57021_Figure_3_figure_supplement_3.pdf
- elife_poa_e57021_Figure_3_figure_supplement_4.pdf
- elife_poa_e57021_Figure_3_figure_supplement_5.pdf
- elife_poa_e57021_Figure_3_figure_supplement_6.pdf
