# Supplementary material for: High-fidelity musculoskeletal modeling reveals that motor planning variability contributes to the speed-accuracy tradeoff
Source: eLife journal article supplement (doi:10.7554/elife.57021), 2020-12-16
Supplement: supp [file elife-57021-supp-v1.zip › elife_poa_e57021_Figure_2_figure_supplement_1.pdf]

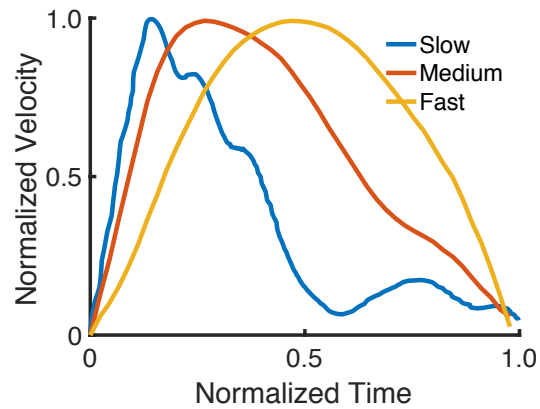

**Figure 2—figure supplement 1. Asymmetry of the Velocity Profile based on Speed.** Normalized velocity profiles (with normalized time) for fast (0.15 s movement duration), medium (0.25 s movement duration) and slow movements (0.45 s movement duration). an earlier peak velocity than faster movements. Our model reproduces the speed-dependent asymmetry in the velocity profile. The relative peak velocities are 0.6133, 0.41 and 0.19 for the fast, medium and slow movements, respectively.
