# Supplementary material for: High-fidelity musculoskeletal modeling reveals that motor planning variability contributes to the speed-accuracy tradeoff
Source: eLife journal article supplement (doi:10.7554/elife.57021), 2020-12-16
Supplement: supp [file elife-57021-supp-v1.zip › elife_poa_e57021_Figure_2_figure_supplement_2.pdf]

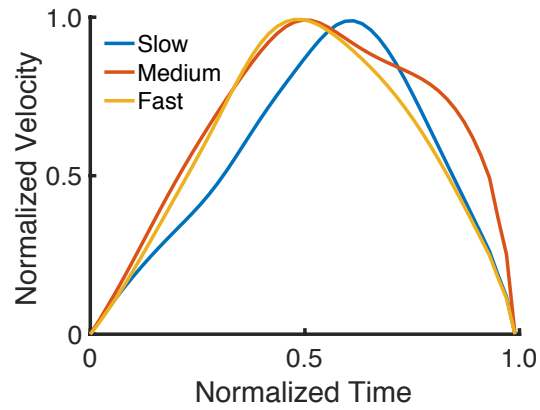

**Figure 2—figure supplement 2. Asymmetry of the Velocity Profile based on Speed with a Torque Driven Model.** Normalized velocity profiles (with normalized time) for fast, medium and slow movements (15 s, 20 s, and 25 s movement durations, respectively). The torque driven model does not reproduce the observation that faster movements tend to have a later peak velocity than slower movements, while this was reproduced with our realistic muscle-based model (see Fig. 2C).
