# Supplementary material for: High-fidelity musculoskeletal modeling reveals that motor planning variability contributes to the speed-accuracy tradeoff
Source: eLife journal article supplement (doi:10.7554/elife.57021), 2020-12-16
Supplement: supp [file elife-57021-supp-v1.zip › elife_poa_e57021_Figure_2_figure_supplement_3.pdf]

**A**

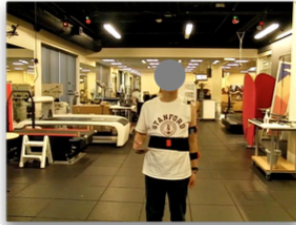

**B**

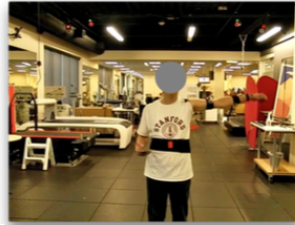

**Figure 2—figure supplement 3. Data Collection. A-B:** Subjects are asked to move to a desired final pose (**B**) from a given initial pose (**A**). This figure is an example of a shoulder 0°-90° abduction movement.
