# Supplementary material for: High-fidelity musculoskeletal modeling reveals that motor planning variability contributes to the speed-accuracy tradeoff
Source: eLife journal article supplement (doi:10.7554/elife.57021), 2020-12-16
Supplement: supp [file elife-57021-supp-v1.zip › elife_poa_e57021_Figure_3_figure_supplement_2.pdf]

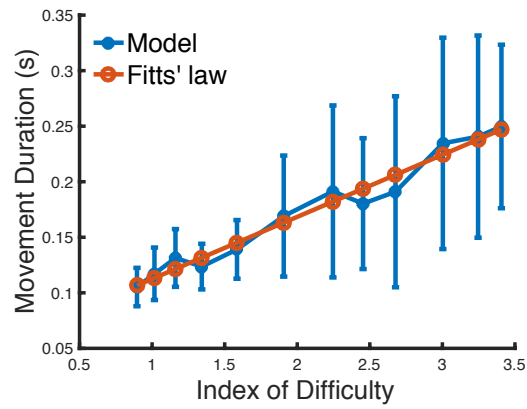

**Figure 3—figure supplement 2. Impact of the Optimizer on the Speed-Accuracy Tradeoff.** We use a much less effective trajectory optimizer than in Fig. 3C to predict the movement duration to a target in a center-out reaching task when varying the target size. The x-axis is the index of difficulty of the reaching movement. We see that the model's mean predictions are still in very close agreement with Fitts' law ( $R^2 = 0.969$ ).
