# Supplementary material for: High-fidelity musculoskeletal modeling reveals that motor planning variability contributes to the speed-accuracy tradeoff
Source: eLife journal article supplement (doi:10.7554/elife.57021), 2020-12-16
Supplement: supp [file elife-57021-supp-v1.zip › elife_poa_e57021_Figure_3_figure_supplement_3.pdf]

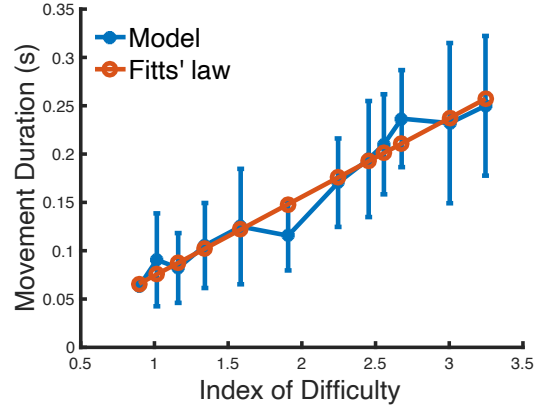

**Figure 3—figure supplement 3. Impact of the Muscle Activations Term on the Speed-Accuracy Tradeoff.** Predicted movement duration to a target in a reaching task when varying the target size without the muscle activation term in Eq. 1. The x-axis is the index of difficulty of the reaching movement. We use CMA-ES with 20 iterations and 20 samples to generate the trajectories. We see that the model's mean predictions are still in close agreement with Fitts' law ( $R^2 = 0.955$ ), which indicates that the muscle activations term alone is not sufficient to explain the speed-accuracy tradeoff. The vertical bars are one standard deviation from the mean.
