# Supplementary material for: High-fidelity musculoskeletal modeling reveals that motor planning variability contributes to the speed-accuracy tradeoff
Source: eLife journal article supplement (doi:10.7554/elife.57021), 2020-12-16
Supplement: supp [file elife-57021-supp-v1.zip › elife_poa_e57021_Figure_3_figure_supplement_6.pdf]

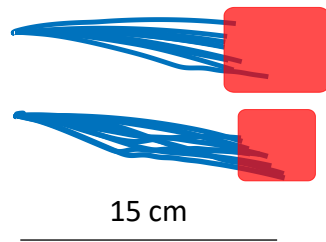

**Figure 3—figure supplement 6. Simulated Hand Paths.** Ten simulated hand paths when reaching for a large and small target 15 cm in distance. In this example, the average movement durations are 0.15s and 0.22 s, respectively. The simulated muscle activity and kinematics are provided in supplementary material.
